# Supplementary material for: In situ detection of silk fibroin using a dual recognition strategy with a flexible pressure immunosensor
Source: Royal Society of Chemistry journal article supplement (doi:10.1039/d3ay01967e), 2024-01-01
Supplement: d3ay01967e1.pdf [file d3ay01967e1.pdf]

**Supporting Information for**

**In situ detection of silk fibroin using a dual recognition strategy with**

**a flexible pressure immunosensor**

Yefeng Deng<sup>a</sup>, Chao Zhang<sup>a</sup>, Lianpeng Lv <sup>a</sup>, Kun Wang<sup>a</sup>, Feng Liu<sup>a</sup>, Yang Zhou<sup>b</sup>,  
Zhiqin Peng<sup>a</sup>, Bing Wang<sup>a,\*</sup>

a. School of Materials Science & Engineering, Zhejiang Sci-Tech University,  
Hangzhou 310018, China

b. Key Scientific Research Base of Textile Conservation, State Administration for  
Cultural Heritage, China National Silk Museum, Hangzhou 310002, China

\*E-mail: wbing388@163.com

Telephone and fax: +86-571-86843867

## **Detection of Silk Fibroin Using Indirect ELISA**

The silk fibroin antigen was diluted with coated buffer into different concentrations (1 ng/mL to 100 µg/mL), 100 µL was added into the reaction hole of each enzymic label plate and placed in the refrigerator at 4 °C overnight. On the next day, the solution in the hole was discarded, and 150 µL of Phosphate Buffered Saline with Tween-20 (PBST) washing solution was added to each hole for washing and repeated 4 times. Each well was sealed with 150 µL 1% (Bovine serum albumin) BSA (prepared with PBS buffer) and incubated at 37 °C for 1 h. Discard the sealer and repeat the washing step 3 times. Dilute fibroin antibody (1:1000, diluted with diluent) was added, 100 µL per reaction hole, and incubated at 37 °C for 1 h. Discard the unbound liquid and repeat the washing step 3 times. Freshly diluted secondary antibody-HRP (1:5000, diluted with diluent) was added to each reaction well with 100 µL per well and incubated at 37 °C for 1 h. Discard the unbound liquid, repeat the above washing steps 5 times, and add TMB color developing solution to each reaction hole, in which liquid A 50 µL and liquid B 50 µL. Place at room temperature and avoid light for 10 min. Add 100 µL of 1 M sulfuric acid solution to each reaction hole. The enzyme plate was placed in a preheated enzyme marker and read at OD<sub>450nm</sub>, then the data was analyzed.
